# Supplementary material for: Engineered LINE-1 retrotransposition in nondividing human neurons
Source: PubMed Central journal article supplement — Genome Res. 2017 Mar;27(3):335–48. doi: 10.1101/gr.206805.116 (PMC5340962; doi:10.1101/gr.206805.116), 2017-03
Supplement: supp_gr.206805.116_Supplemental_Fig_S6.pdf [file supp_gr.206805.116_Supplemental_Fig_S6.pdf]

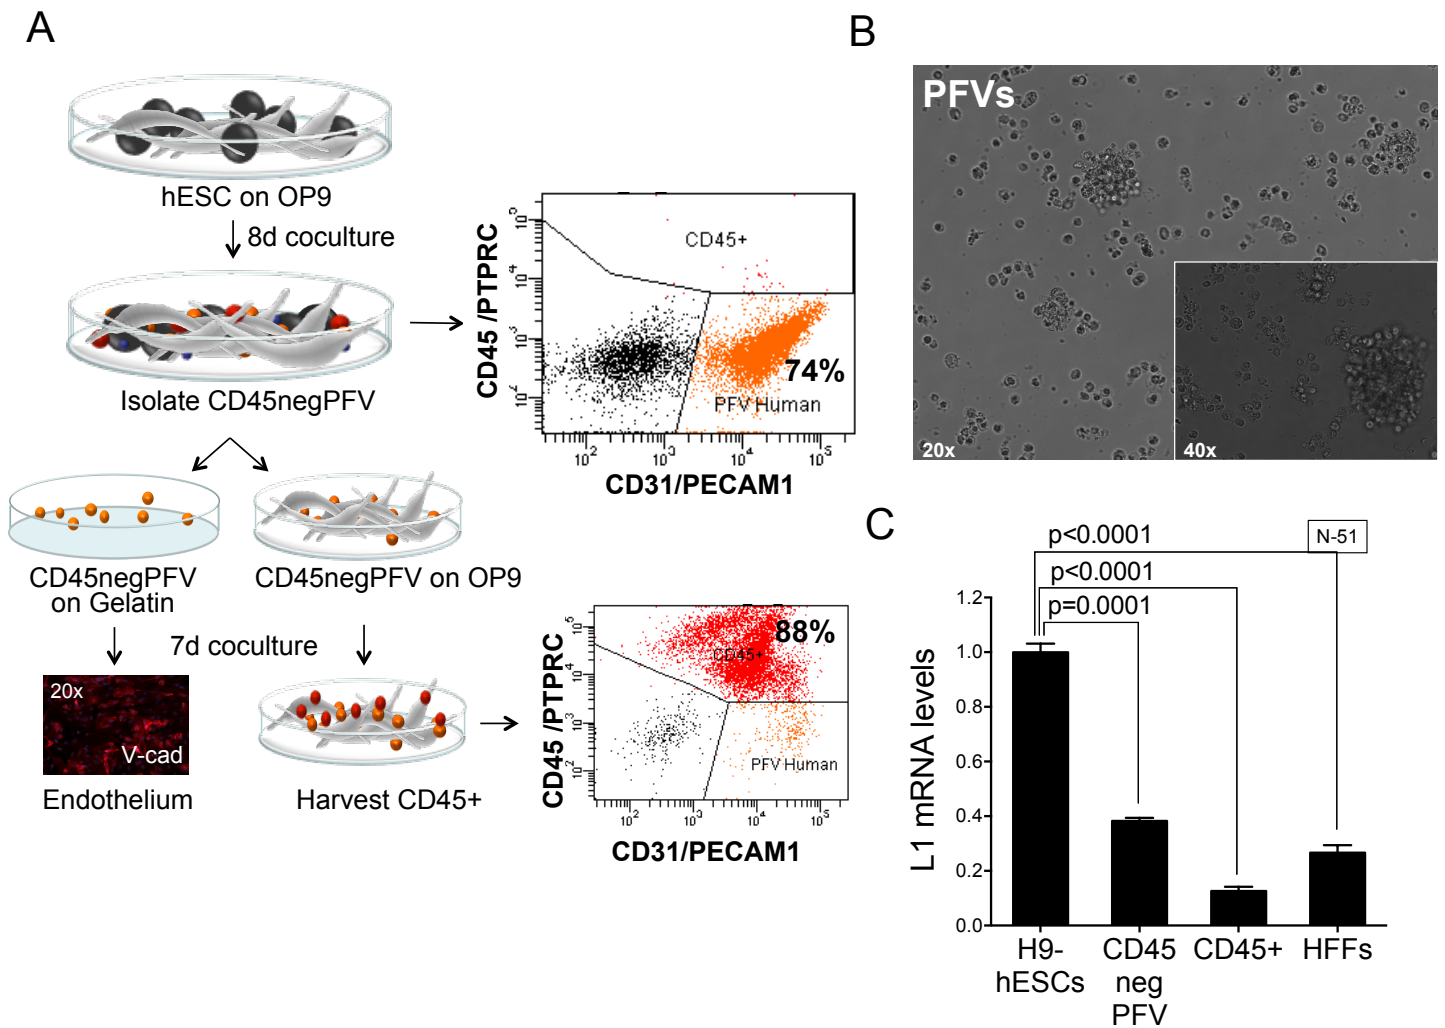

**Supplemental Fig. 6. HSC-differentiation from hESCs using the OP9 method.** (A) Scheme of the protocol used to isolate CD45neg PFV and CD45+ populations of HSCs from hESCs using the OP9 method. See methods for further details. The top FACS histogram is also shown in Figure 3g; the bottom FACS histogram shows representative FACS analyses (CD45/PTPRC vs CD31/PECAM1) conducted 7d after culturing CD45negPFVs with OP9 cells. (B) Shown is an image of CD45neg PFV foci captured at 20x or 40x magnification. (C) L1Hs mRNA expression analysis in CD45+ and CD45negPFV populations derived using the OP9 method. Shown is RT-qPCR data from an assay using a set of primers to the 5'UTR of a consensus L1Hs element (N-51). The graph shows expression data in the indicated sample and the expression level detected in H9-hESCs was designated 1 for comparison (n=1 biological replica). Also indicated is the SEM and p value of the comparisons (<0.0001, 0.0001, One-way ANOVA with Tukey).
