# Supplementary material for: Engineered LINE-1 retrotransposition in nondividing human neurons
Source: PubMed Central journal article supplement — Genome Res. 2017 Mar;27(3):335–48. doi: 10.1101/gr.206805.116 (PMC5340962; doi:10.1101/gr.206805.116), 2017-03
Supplement: supp_gr.206805.116_Supplemental_Fig_S7.pdf [file supp_gr.206805.116_Supplemental_Fig_S7.pdf]

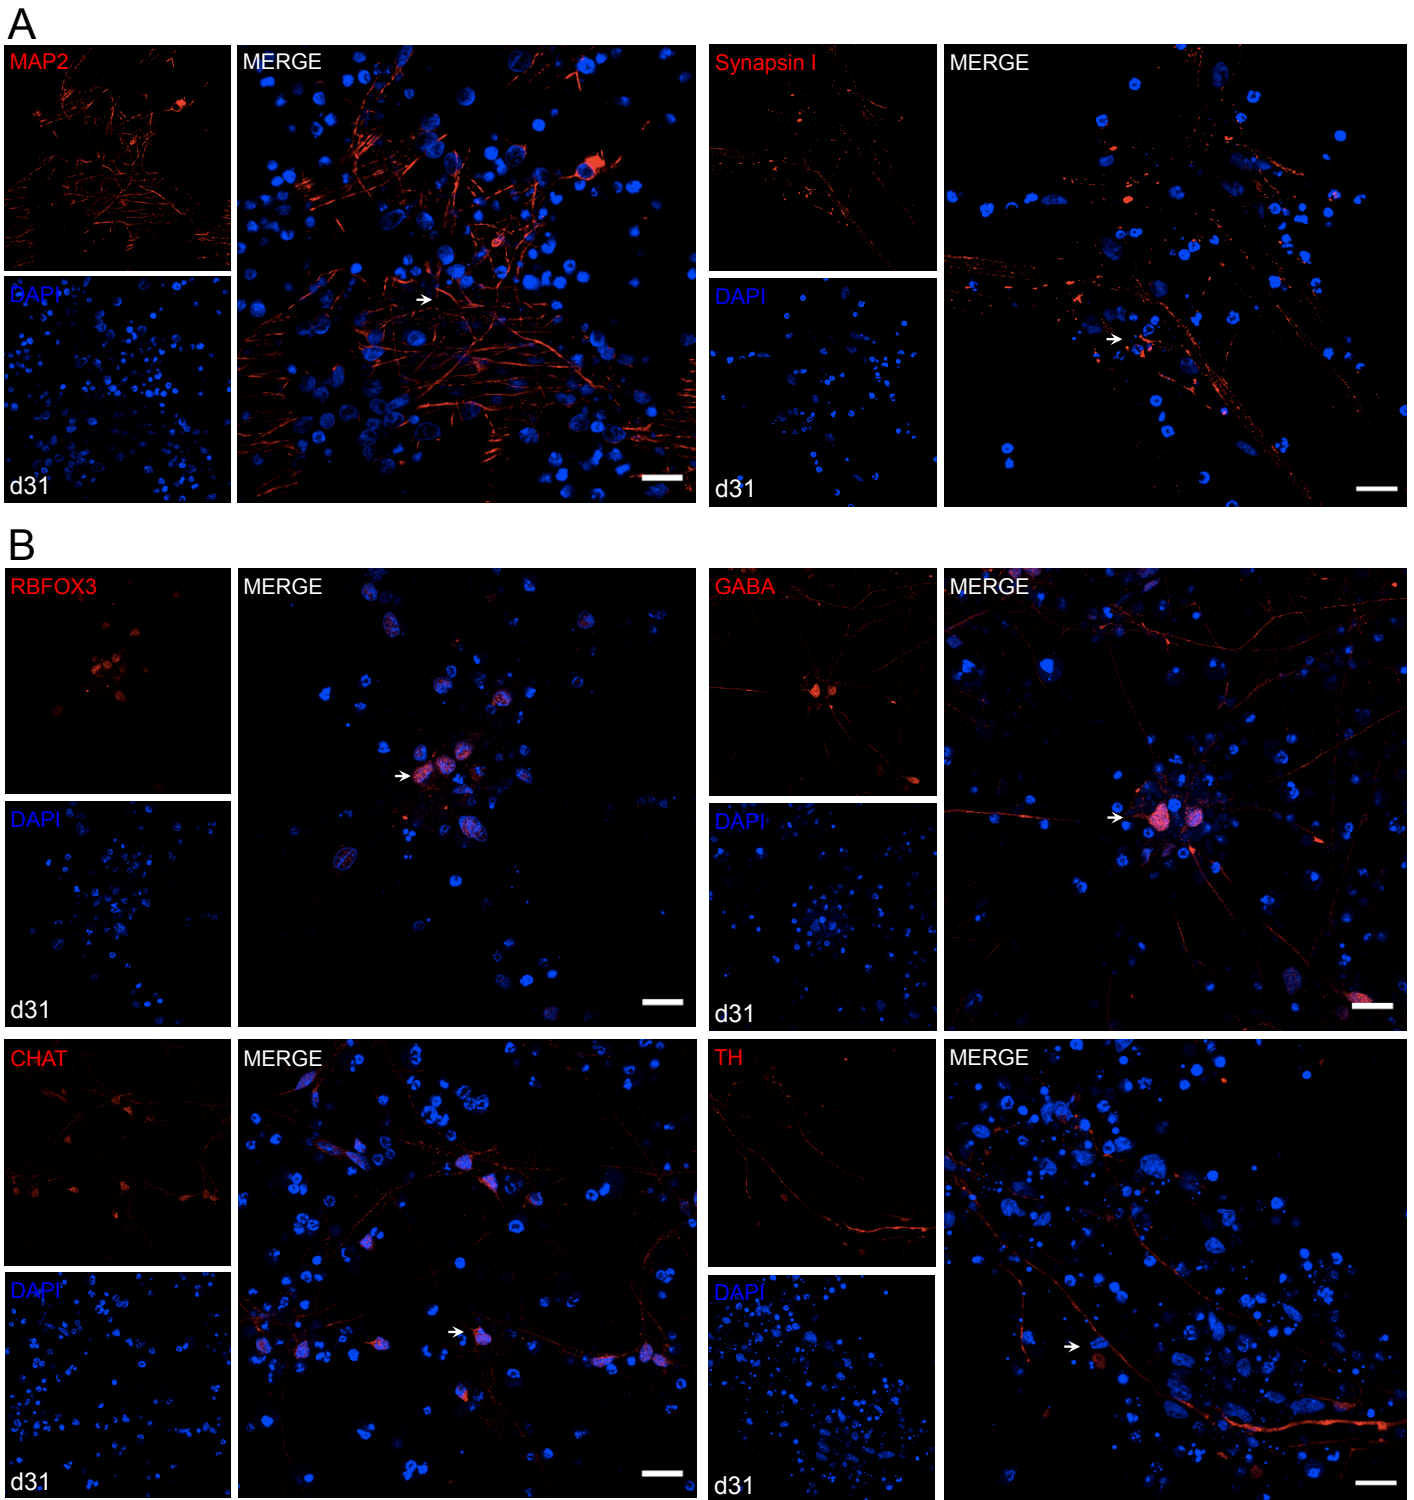

**Supplemental Fig. 7. hESC-derived NPCs can differentiate to mature neuronal cells.** (A) Representative quality controls on NPC-derived mature neuronal cells. A merged image of differentiated NPCs 31 days after initiation of differentiation and stained with an antibody against MAP2 (red, left panel) or Synapsin I (red, right panel); in both panels, nuclear DNA was stained with DAPI (blue). White bars, 20 mm. (B) Differentiated NPCs express neuron subtype specific markers. Shown are merged images of NPCs 31 days after initiation of differentiation and stained with an antibody against RBFOX3 (red, top left panel), GABA (red, top right panel), CHAT (red, bottom left panel) and TH (red, bottom right panel).
