# Supplementary material for: Engineered LINE-1 retrotransposition in nondividing human neurons
Source: PubMed Central journal article supplement — Genome Res. 2017 Mar;27(3):335–48. doi: 10.1101/gr.206805.116 (PMC5340962; doi:10.1101/gr.206805.116), 2017-03
Supplement: supp_gr.206805.116_Supplemental_Fig_S8.pdf [file supp_gr.206805.116_Supplemental_Fig_S8.pdf]

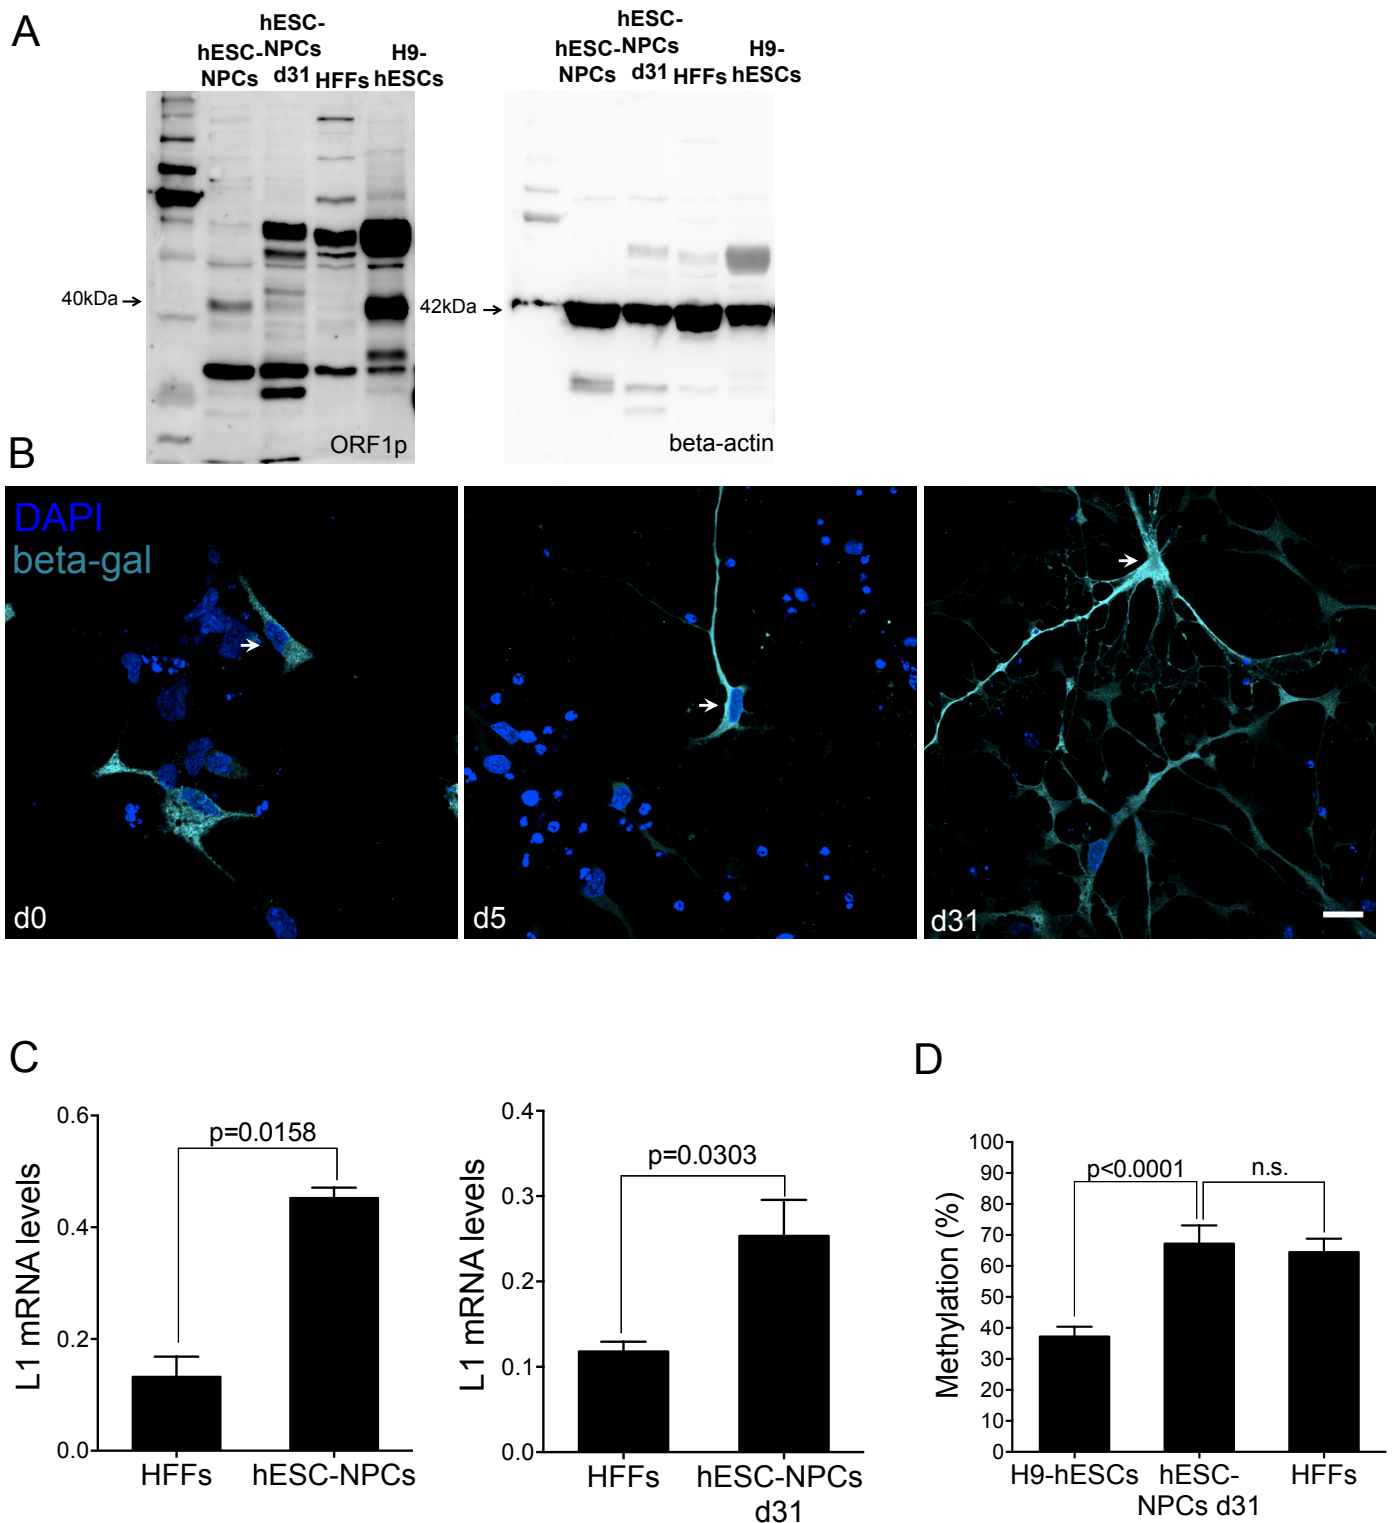

**Supplemental Fig. 8. L1 expression and infection controls in NPC-derived mature neuronal cells.** (A) Full size Western blot scans of blots shown in Figure 5B. (B) Ad-L1 infection controls. Each image shows a merged capture of differentiating NPCs infected with Ad-L1 at the indicated time (days 0, 5 and 31) and stained with an antibody against  $\beta$ -gal (light blue); nuclear DNA was stained with DAPI (dark blue). White bars, 20  $\mu$ m. (C) L1 mRNA expression analyses in NPC-derived mature neuronal cells. Each graph compare L1 mRNA expression values detected in HFFs and hESC-NPCs (left panel) or hESC-NPCs-d31 (right panel). The p value obtained in an unpaired *t*-test analysis is shown (0.0158 and 0.0303). Note that these values are also included in panels 1B and 5A, respectively. (D) DNA-Methylation analyses in HFFs and hESC-NPCs-d31. The graph indicates the percentage of methylated CpG residues within L1Hs 5'UTR sequences as measured by bisulfite-PCR assays in the indicated sample. One-way ANOVA with Tukey was used as a statistical method; the p value is included (0.0001 and n.s., not significant).
