# Supplementary material for: Engineered LINE-1 retrotransposition in nondividing human neurons
Source: PubMed Central journal article supplement — Genome Res. 2017 Mar;27(3):335–48. doi: 10.1101/gr.206805.116 (PMC5340962; doi:10.1101/gr.206805.116), 2017-03
Supplement: supp_gr.206805.116_Supplemental_Fig_S9.pdf [file supp_gr.206805.116_Supplemental_Fig_S9.pdf]

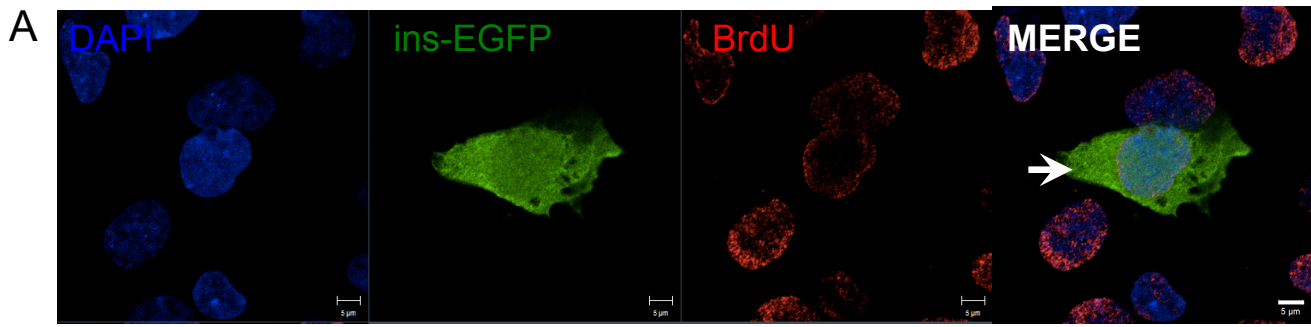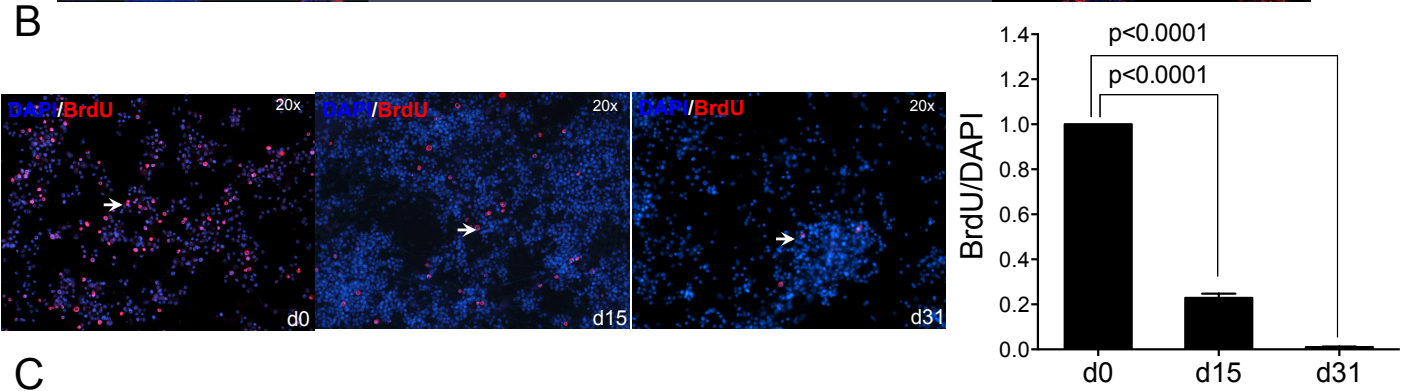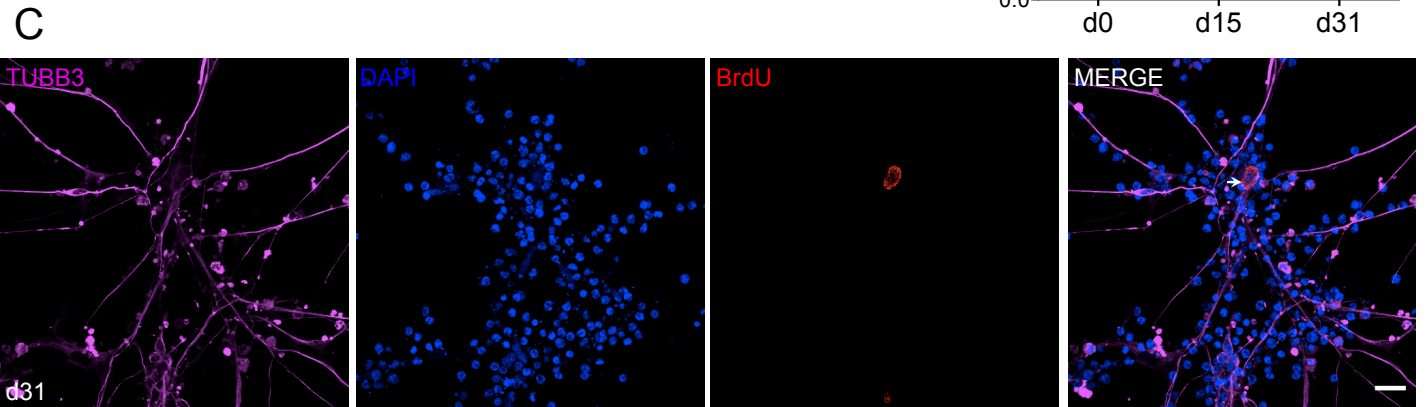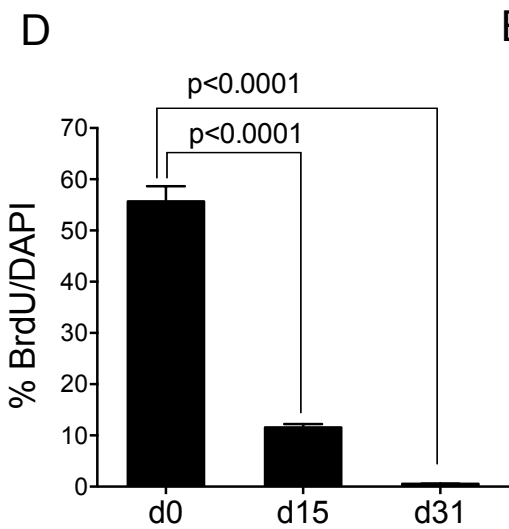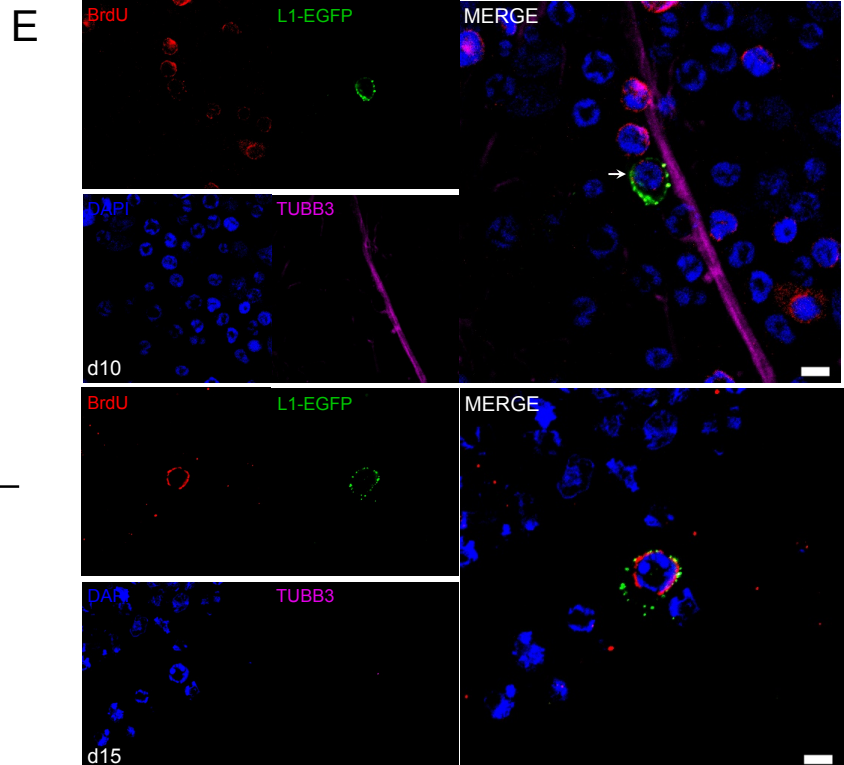

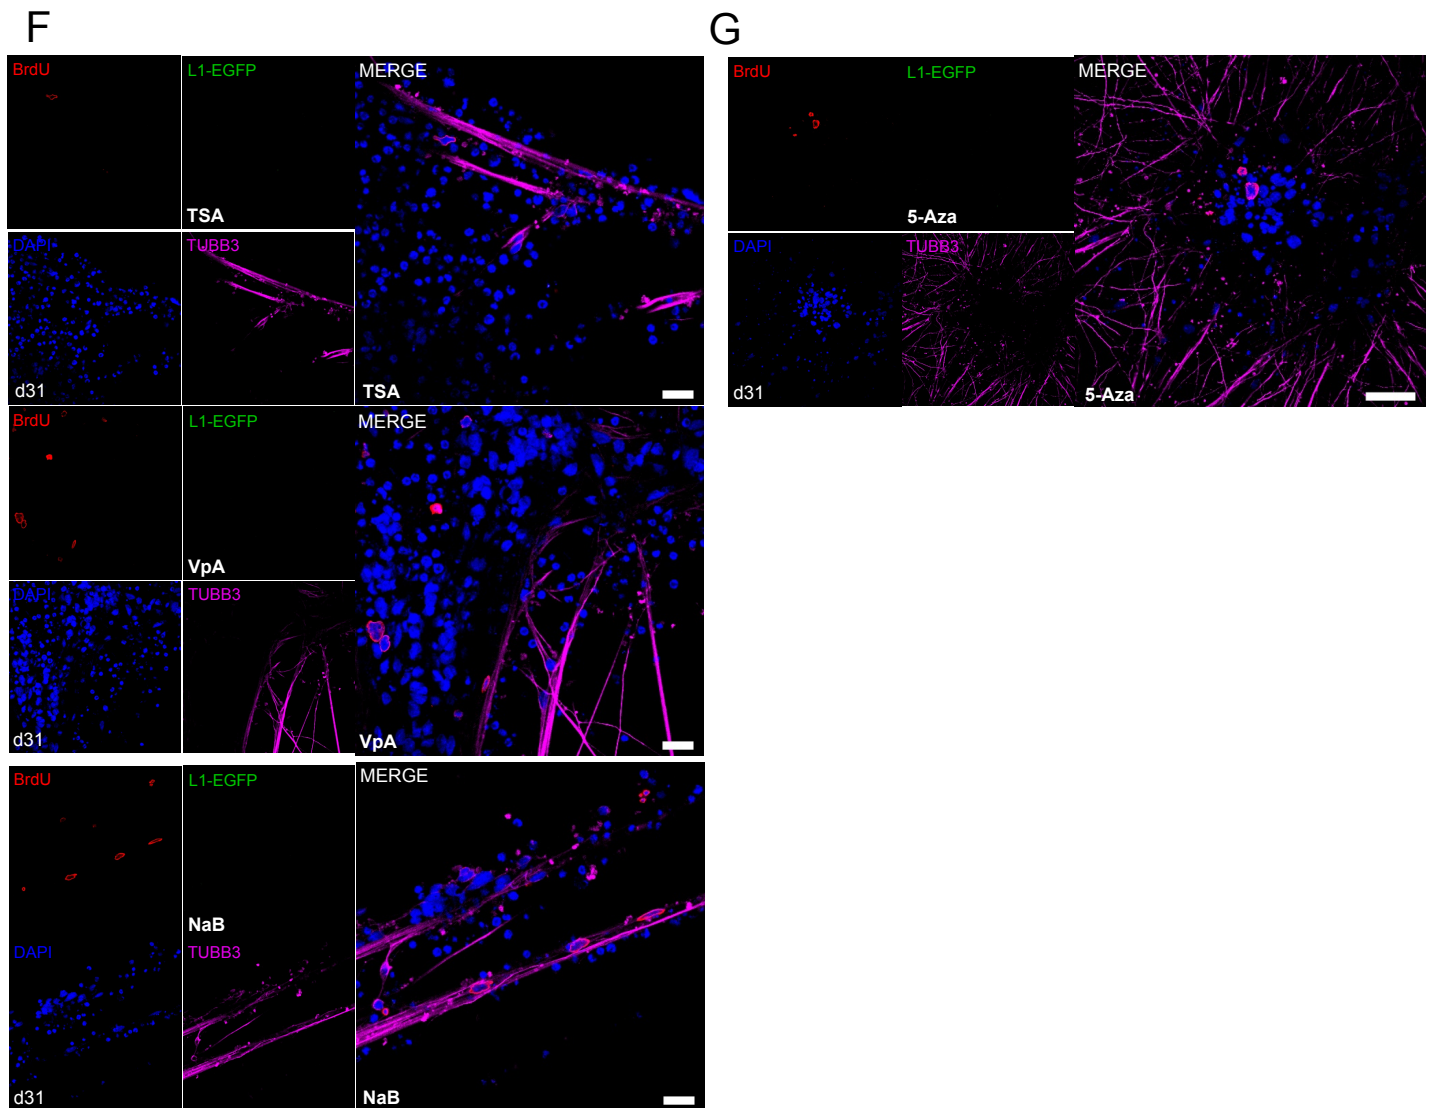

**Supplemental Fig. 9. Engineered L1 retrotransposition in NPC-derived mature neuronal cells.** (A) Dual staining of L1-EGFP and BrdU in cultured cells. Shown is a merged image of cultured pc39 cells stained with an antibody against BrdU (red) and EGFP (green); nuclear DNA was stained with DAPI (blue). Pc39 cells have been described previously (see Methods); it is a clonal cell line that contains at least two silenced L1-EGFP insertions. White bars, 5  $\mu$ m. (B) BrdU labeling in differentiating NPCs. Shown are merged images of differentiating NPCs stained at the indicated time (day 0, 15 and 31) with an antibody against BrdU (red); nuclear DNA was stained with DAPI (blue). The right graph shows a quantification of the ratio of nuclei that stain positive for BrdU at the indicated time. The SEM of the assay is also included and a One-way ANOVA with Tukey was used as a statistical method. The p value is included ( $<0.0001$ ). (C) BrdU incorporation in differentiated NPCs. A merged image of differentiated NPCs (day 31) stained with an antibody against TUBB3 (pink) and BrdU (red); nuclear DNA was stained with DAPI (blue). White bars, 20  $\mu$ m. (D) The graph shows a quantification of the percentage of nuclei that stain positive for BrdU in double DAPI/BrdU staining experiments at the indicated time. The SEM of the assay is also included and a One-way ANOVA with Tukey was used as a statistical method (p value,  $<0.0001$ ). (E) Representative results from retrotransposition assays conducted in differentiating NPCs using the Ad-L1 and analyzed 10 and 15 days after infection. Cells were stained with an antibody against TUBB3 (pink) and BrdU (red); nuclear DNA was stained with DAPI (blue) and L1-EGFP expression was visualized using an EGFP polyclonal antibody (green). The left side contains the independent captured images used in the merged picture. White bars, 5  $\mu$ m. Also indicated in each panel is the day when infection was performed (white letters). (F&G) Neither treatment with Histone Deacetylase Inhibitors (F) or 5-Aza (G) resulted in L1-EGFP expression. As in panel E, shown is a staining assay on Ad-L1 infected NPC-derived neurons at day 31 of differentiation. Cells were stained with an antibody against TUBB3 (pink) and BrdU (red); nuclear DNA was stained with DAPI (blue) and L1-EGFP expression was visualized using an EGFP polyclonal antibody (green). The left side contains the independent captured images used in the merged picture. White bars, 20 (E) and 50 (F)  $\mu$ m. Also indicated in each panel is the day when infection was performed and the treatment applied (white letters, see Methods).
