# Supplementary material for: Engineered LINE-1 retrotransposition in nondividing human neurons
Source: PubMed Central journal article supplement — Genome Res. 2017 Mar;27(3):335–48. doi: 10.1101/gr.206805.116 (PMC5340962; doi:10.1101/gr.206805.116), 2017-03
Supplement: supp_gr.206805.116_Supplemental_Fig_S12.pdf [file supp_gr.206805.116_Supplemental_Fig_S12.pdf]

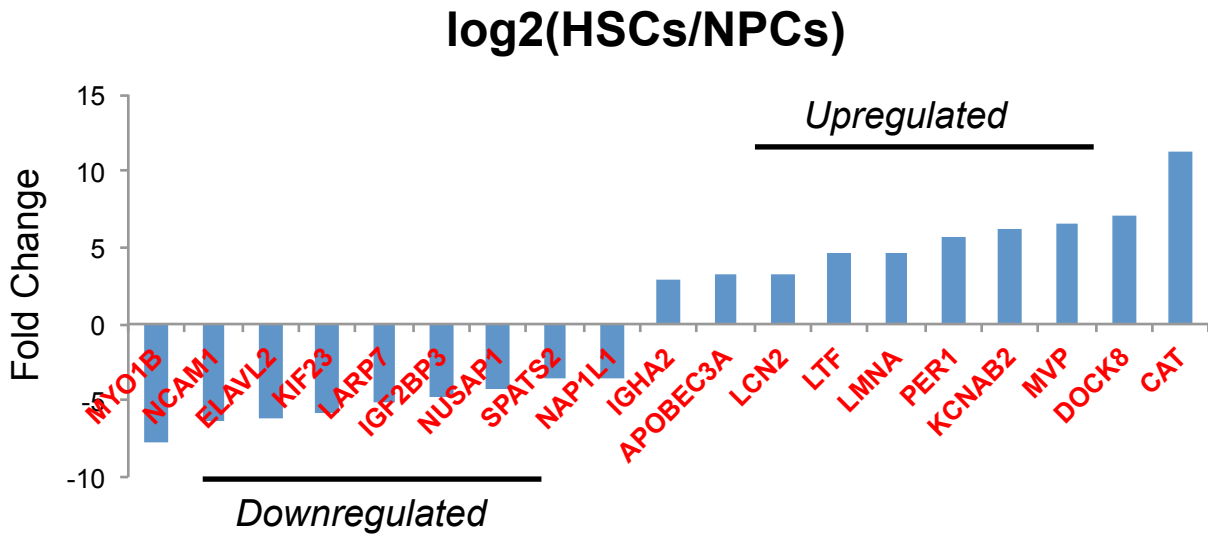

**Supplemental Fig. 12. Gene expression profiles in human cells.** Gene expression analyses in HSCs and NPCs. The graph indicates each statistically significant change in gene expression detected in HSCs when RNA-seq data was compared to NPCs (see Methods).
