# Supplementary material for: Engineered LINE-1 retrotransposition in nondividing human neurons
Source: PubMed Central journal article supplement — Genome Res. 2017 Mar;27(3):335–48. doi: 10.1101/gr.206805.116 (PMC5340962; doi:10.1101/gr.206805.116), 2017-03
Supplement: supp_gr.206805.116_Supplemental_Table_S1.pdf [file supp_gr.206805.116_Supplemental_Table_S1.pdf]

**Supplemental Table 1.** Primers used in this study.

| Primer         | Sequence (5' to 3').      |
|----------------|---------------------------|
| 5S-Fw          | CTCGTCTGATCTCGGAAGCTAAG   |
| 5S-Rev         | GCGGTCTCCCATCCAAGTAC      |
| ACTINB Fwd     | ACCGAGCGCGGCTACAG         |
| ACTINB Rev     | CTTAATGTCACGCACGATTTC     |
| GAPDH Fwd      | TGCACCACCAACTGCTTAGC      |
| GAPDH Rev      | GGCATGGACTGTGGTCATGAG     |
| GFP1013R       | TCTTTGCTCAGGGCGGACTG      |
| GFP968F        | GCACCATCTTCTTCAAGGACGAC   |
| GLB1 Fwd       | GCGTTAACTCGGCGTTTCAT      |
| GLB1 Rev       | GCGCTCAGGTCAAATTCAGAC     |
| ORF1Fwd        | AGGAAATACAGAGAACGCCACAA   |
| ORF1Rev        | GCTGGATATGAAATTCTGGGTTGA  |
| RealEGFP-Fwd   | GGTCACGAACTCCAGCAG        |
| RealEGFP-Rev   | CAGAAGAACGGCATCAAGG       |
| sv40pA Fwd     | CAAACCACAACTAGAATGCAGTG   |
| sv40pA Rev     | CTCCCCCTGAACCTGAAACAT     |
| N51 Fwd        | GAATGATTTTGACGAGCTGAGAGAA |
| N51 Rev        | GTCCTCCCGTAGCT CAGAGTAATT |
| N22 Fwd        | CAAACACCGCATATTCTCACTCA   |
| N22 Rev        | CTTCCTGTGTCCATGTGATCTC    |
| L1 5' UTRm Fwd | ACGGAATCTCGCTGATTGCTA     |
| L1 5' UTRm Rev | AAGCAAGCCTGGGCAATG        |
