# Supplementary material for: Engineered LINE-1 retrotransposition in nondividing human neurons
Source: HighWire-hosted journal article supplement (doi:10.1101/gr.206805.116), 2016-12-13
Supplement: Supplemental_Methods.docx [file Supplemental_Methods.docx]

**SUPPLEMENTAL METHODS**

***Cell line culturing.***

All reagents were purchased from GIBCO-Life Technologies unless otherwise indicated. HeLa-JVM cells were grown as previously described ([Athanikar et al. 2004](#_ENREF_2)). Briefly, cells were passaged by standard trypsinization (using a 0.05% stock) and the culture media used was Dulbecco's Modified Eagle Medium (DMEM) high glucose, supplemented with 10% foetal bovine serum (FBS), GlutaMAX, and Penicillin-Streptomycin (10,000 U/mL).

Human pk87 cells have been described previously ([Garcia-Perez et al. 2010](#_ENREF_10)). pk87 is a clonal cell line derived from PA-1 human embryonic carcinoma cells ([Zeuthen et al. 1980](#_ENREF_39)) that contains two L1-EGFP-tagged retrotransposition events as determined by Southern-blotting. The cell line was not used in this study, but we used genomic DNA isolated from this cell line in conventional and quantitative PCR experiments (see below).

Human adipose-derived stem cells (ASC-MSCs), human bone marrow stromal cells (BM-MSCs), and human MSCs derived from umbilical cord (UC-MSCs) were obtained from Inbiobank (San Sebastian, Spain). hESC-derived MSCs were obtained as previously described ([Sanchez et al. 2011](#_ENREF_29)). All MSCs were grown in Advance DMEM with 10% heat-inactivated foetal bovine serum (FBS), 2mM L-Glutamine, and Penicillin-Streptomycin (10,000 U/mL).

Human foreskin fibroblasts (HFFs, passage 3-10, from ATCC) were grown following the provider’s instructions in Iscove’s Modified Dulbecco’s Medium (IMDM) supplemented with 25 mM HEPES, 2mM L-glutamine and 10% heat-inactivated foetal bovine serum (FBS).

Human embryonic stem cells (hESCs) were grown as previously described ([Garcia-Perez et al. 2007](#_ENREF_9)). The hESC line WA09/H9 was obtained from Wicell and maintained in HFF-conditioned media (HFF-CM) using Matrigel coated plates. To prepare HFF-CM, HFFs were mitotically inactivated by γ-irradiation with 3000-3200 rads, seeded at 3x106 cells/T225 flask and cultured with hESC media (DMEM KnockOut supplemented with 4 ng/ml β-FGF, 20% Knockout serum replacement, 1mM L-Glutamine, 0.1 mM -mercaptoethanol, and 0.1mM non-essential amino acids) for 24 h. Next, HFF-CM was collected and frozen until used. We repeated this procedure and collected HFF-CM for seven days. hESC-NPCs were cultured in KnockOut DMEM/F-12 with Stem Pro Neural Supplement, 1mM L-Glutamine and Penicillin-Streptomycin (10,000 U/mL). All the cell lines were grown in a humidified 7% CO2 incubator at 37ºC.

Absence of *Mycoplasma spp*. in cultured cells was confirmed at least once a month by a PCR-based assay (Minerva). Karyotyping, SNP genotyping and/or STR-genotyping controlled the identity of cell lines used in this study (LorGen, Granada, Spain).

***MSCs differentiation assays.***

Differentiation of MSC cell cultures was performed as previously described ([Raya et al. 2009](#_ENREF_25); [Sanchez et al. 2011](#_ENREF_29)). Briefly, MSCs were plated at 2x104 cells/cm2 in MesenCult medium (Stemcell) and allowed to adhere for 24 hours. For adipogenic differentiation, confluent cultures of MSCs were cultured on SingleQuots adipogenic Induction Medium + Kit (Lonza), changing the media every 3-4 days. After 1 week, the adipogenic Maintenance SingleQuots Medium + Kit (Lonza) was used during 1 week, changing the media every 3-4 days. To control for adipogenic differentiation, a fraction of cultured cells was stained with Oil Red O (Sigma). For osteogenic differentiation of MSCs, confluent cultures of MSCs were cultured with Osteogenic-SingleQuots Differentiation Kit + Basal Medium (Sigma) during two weeks. Media was changed every 3-4 days and after 2 weeks, osteogenic differentiation was analyzed by Alizarin Red (Sigma) staining. For chondrogenic differentiation assays we used 15-ml polypropylene centrifuge tubes. Briefly, a cellular suspension containing 1.25×106 MSCs/ml was centrifuged at 500 × g for 5 min and directly placed in the incubator using chondrogenic differentiation medium. Chondrogenic differentiation medium consists of DMEM high glucose containing: 10% ITS (10 μg/ml bovine insulin, 5.5 μg/ml transferrin, 5 μg/ml sodium selenite, Sigma), 100 nM Dexamethasone, 1 μM ascorbate-2-phosphate, 1% sodium pyruvate, and 10 ng/ml transforming growth factor-beta 3 (TGF-β3). After 3-weeks, chondrogenic cultures were harvested, the aggregates transferred to histology cassettes and fixed in 10% neutral-buffered formalin for 24 hours. Chondrogenic differentiation was assessed by Alcian blue staining of pellet sections, whereby cartilaginous extracellular matrix will stain blue.

***Hematopoietic differentiation of hESCs using an Embryoid Body assay and Ad-L1 retrotransposition assays.***

Hematopoietic differentiation of hESCs using an Embryoid Bodies (EBs) differentiation protocol was performed as previously described ([Chadwick et al. 2003](#_ENREF_4); [Wang 2006](#_ENREF_33); [Wang et al. 2006](#_ENREF_34)). Briefly, undifferentiated hESCs grown on Matrigel were detached from plates using a cell scraper (Sarstedt) and transferred to Ultra-Low-attachment plates (Corning) allowing EB formation in differentiation medium: DMEM Knockout supplemented with 20% FBS, 0.1mM non-essential amino acids, 1 mM L-glutamine, and 0.1 mM β-mercaptoethanol. Next day, the culture medium was changed and hematopoietic cytokines added (300 ng/ml stem cell factor (SCF), 300 ng/ml Flt3 ligand, 10 ng/ml interleukin-3 (IL-3), 10 ng/ml interleukin-6 (IL-6), 50 ng/ml granulocyte colony–stimulating factor (GCSF), and 25 ng/ml bone morphogenetic protein-4 (BMP-4) (PeproTech))as described in ([Chadwick et al. 2003](#_ENREF_4); [Wang et al. 2006](#_ENREF_34)). EBs were cultured for 15 days with another change of medium supplemented with cytokines at day 5 of EB development. EBs were dissociated at day 15 of development using 0.4 U/ml collagenase B (Roche) and Cell Dissociation Buffer (GIBCO-Life Technologies). Cells were then resuspended gently in Iscove's Modified Dulbecco's Medium (IMDM), passed through a 70-μm cell strainer, and stained with anti-CD31-PE, anti-CD45-APC, anti-CD34-FITC and 7AAD (BD Biosciences) as described ([Real et al. 2012](#_ENREF_26)). Hemogenic precursors with hemangioblastic properties were identified as CD34+CD31+CD45−, also named as CD45negPFV (negative expression for CD45, and positive expression for platelet endothelial cell adhesion molecule (PECAM-1/CD31), FLK1, and vascular endothelial-cadherin (VE-cad, CD144)). Immature and mature blood cells were identified as CD45+CD34+ and CD45+CD34−, respectively. The three populations were analyzed using a BD fluorescence-activated cell sorting (FACS) Aria device, cultured on fibronectin-coated plates (BD Biosciences), and exposed to the Ad-L1 during approximately 4 hours under serum-free conditions. StemSpanTM SFEM (STEMCELL) supplemented with hematopoietic cytokines without BMP-4 was used during and after adenoviral infection as described ([Menendez et al. 2004](#_ENREF_17)). Cells were collected and analyzed 4 days post-infection.

***Hematopoietic differentiation of hESCs using OP9 stromal cells and Ad-L1 retrotransposition assays.***

Hematopoietic differentiation of hESCs using the OP9 co-culture method was performed as previously described ([Vodyanik and Slukvin 2007](#_ENREF_32); [Ji et al. 2008](#_ENREF_13); [Choi et al. 2011](#_ENREF_5)). Briefly, OP9 mouse bone marrow stromal cells were cultured in Minimum Essential Medium (MEM α) without ribonucleosides/deoxyribonucleosides supplemented with 20% FBS. OP9 cells were seeded on gelatin-coated plates (Sigma) and 8 days later overgrown OP9 cultures were prepared for co-culturing. Undifferentiated hESCs cells were dissociated in small aggregates using Collagenase IV and plated at a 1.5×106 hESCs/10-cm OP9 dish dilution for hematopoietic differentiation. Cells were then co-cultured during 8 days in differentiation medium (MEM α, 10% foetal bovine serum, 100 μmol/l monothioglycerol (MTG), and 50 μg/ml ascorbic acid). Every day, media was replaced by fresh differentiation medium but only a “half-volume” media change was performed every other day. After 8 days, cells were collected using Collagenase IV and trypsin/EDTA solutions, washed, filtered through a 40-μm-cell strainer and re-suspended in MACS buffer (Miltenyi Biotec). hESC-derived hematopoietic progenitors were sorted by magnetic-activated cell sorting AutoMACS (Miltenyi Biotec) with the CD34 hematopoietic marker (CD34 MicroBead Kit, Miltenyi Biotec). To obtain CD45-positive cells, hematopoietic progenitors were plated in new OP9 culture supplemented with hematopoietic cytokines (150ng/ml SCF, 150ng/ml Flt3 ligand, 10ng/ml IL-3, 10ng/ml IL-6, 50ng/ml GCSF), and collected from the supernatant 5 days after as described ([Ji et al. 2008](#_ENREF_13)). To assess hematopoietic differentiation, cells were analyzed by flow cytometry using the indicated antibodies. Cells were stained with anti-mouse CD29-FITC (AbD Serotec) to exclude OP9 cells from further analyses. Human hematoendothelial progenitors (CD31+CD45−), primitive blood cells (CD34+CD45+), and total blood cells (CD45+) were analyzed as described above. The collected populations were plated for Ad-L1 infection on fibronectin-coated plates (BD Biosciences) in StemSpanTM SFEM (STEMCELL) supplemented with hematopoietic cytokines without BMP-4 and without serum. Cells were collected after 4 days post-infection and analyzed as described.

***Purification of CD34+ cells from Umbilical Cord Blood and Colony-forming unit (CFU) assays.***

Umbilical cord blood (UC Blood) samples were obtained from local hospitals and pooled to reduce variability among individuals. CB samples were diluted and carefully laid over Ficoll-PaqueTMPLUS (GE Healthcare). After centrifugation, the interphase cells (lymphocytes, monocytes, and thrombocytes) were isolated and separated from platelets and red-blood cells. Cells were then labelled with magnetic beads (CD34 MicroBead kit, Miltenyi Biotec) and sorted in an autoMACSTM Pro separator (Miltenyi Biotec) as per the manufacturer’s instructions. The purity of the isolated hematopoietic progenitor cells was evaluated by flow cytometry using anti-CD34-phycoerythrin (PE; BD Biosciences); only CD34+ fractions showing more than 85% purity were used. CD34+ cells isolated were plated on fibronectin-coated plates (BD Biosciences) for Ad-L1 infection under serum-free conditions in StemSpanTM SFEM (STEMCELL) supplemented with hematopoietic cytokines/no BMP-4. Four days after infection, cells were collected and analyzed.

A human clonogenic progenitor assay was performed by plating 103 CB-derived CD34+/enriched fraction cells into methylcellulose H4434 (Stem Cell Technologies) supplemented with hematopoietic cytokines: 50ng/ml SCF, 10ng/ml granulocyte-macrophage colony-stimulating factor (GM-CSF), 10ng/ml IL3 and 3U/ml erythropoietin. Colonies were analyzed after 14 days and analyzed using standard morphological criteria.

***Derivation of Neural Progenitor Cells (NPCs) from hESCs and terminal differentiation of NPCs.***

To induce the differentiation of neuronal progenitor cells (NPCs) from hESCs, we used a previously established methodology ([Coufal et al. 2009](#_ENREF_7); [Muotri et al. 2010](#_ENREF_21)). Briefly, hESCs grown on Matrigel were cultured during 2 days in N2 media (DMEM/F12 + N2 supplement) containing 1µm of dorsomorphin (Calbiochem) and 10µm of SB-431542 (Sigma). Next, undifferentiated hESCs were detached using a cell-scraper and transferred to low-attachment plates to allow for EB formation with the same differentiation media. The EBs were then plated in a 60-mm matrigel-coated plate, and cultured for 5-7 days using NB medium (0.5x N2, 0.5x B-27, 20ng/ml of FGF-2 (Miltenyi Biotec) and 1% Penicillin-Streptomycin), changing the media every other day. Rosettes were collected, dissociated and plated on poly-L-ornithine (Sigma)/Laminin (Invitrogen) plates using NB medium. NPCs were expanded when confluent using StemPro Accutase Cell Dissociation Reagent (Invitrogen). To induce neural differentiation from confluent NPCs, FGF-2 was withdrawn from the NB media and changed every other day. A fully differentiation process was achieved approximately in 1 month.

***Plasmid constructs.***

All plasmids were purified using a Plasmid Midi kit from Qiagen and analyzed by electrophoresis (0.7% agarose-ethidium bromide gels). Only highly supercoiled DNA preparations were used in transfection experiments.

**p99-gfp-LRE3:** has been described previously ([Coufal et al. 2009](#_ENREF_7)); it contains a full-length retrotransposition-competent L1 element (LRE3) ([Brouha et al. 2002](#_ENREF_3)) tagged with a *mEGFPI* retrotransposition indicator cassette ([Ostertag et al. 2000](#_ENREF_22)) and is cloned in a modified version of pCEP4 (Invitrogen) that lacks a CMV promoter and contains a puromycin marker instead of a hygromycin resistant marker ([Garcia-Perez et al. 2010](#_ENREF_10)).

**p99-gfp-JM111:** has been described previously ([Ostertag et al. 2000](#_ENREF_22)); it contains a full-length retrotransposition-defective L1 element (L1RP([Kimberland et al. 1999](#_ENREF_14))) that contains two engineered missense mutations in L1-ORF1p (RR261/62AA) tagged with a *mEGFPI* retrotransposition indicator cassette and is cloned in a modified version of pCEP4 (Invitrogen) that lacks a CMV promoter and contains a puromycin marker instead of a hygromycin resistant marker.

**p99-gfp-LRE3-UB*:** is a derivative of plasmid p99-gfp-LRE3 where the CMV promoter that drives expression of EGFP in the *megfpI* cassette has been replaced by the human UBC promoter (nucleotides 125398319-125399530 of human chromosome 12). A similar plasmid was described in ([Wissing et al. 2011](#_ENREF_37); [Wissing et al. 2012](#_ENREF_38)).

**p99-gfp-JM111-UB*:** is a derivative of plasmid p99-gfp-JM111 where the CMV promoter that drives expression of EGFP in the *megfpI* cassette has been replaced by the human UBC promoter (nucleotides 125398319-125399530 of human chromosome 12).

**ks101/LRE3-sv+:** has been described previously ([Garcia-Perez et al. 2007](#_ENREF_9)). It contains a full-length retrotransposition-competent L1 element (LRE3) ([Brouha et al. 2002](#_ENREF_3)) tagged with a *mneoI* retrotransposition indicator cassette ([Freeman et al. 1994](#_ENREF_8); [Moran et al. 1996](#_ENREF_19)) and is cloned in a modified pBSKS-II vector (Stratagene) that contains an SV40-late polyadenylation sequence downstream of the tagged L1.

**pU6i neo**: has been described previously ([Richardson et al. 2014](#_ENREF_27)). It contains the neomycin phosphotransferase (NEO) gene from pEGFP-N1 (Clontech) cloned in pBS KS-II. The plasmid also contains a U6 promoter.

**pCEP-EGFP**: has been described previously ([Alisch et al. 2006](#_ENREF_1)) and contains the coding sequence of the humanized Enhanced Green Fluorescent Protein (EGFP) cloned in pCEP4.

***Transfection of cultured cells and retrotransposition assays using plasmids.***

HeLa-JVM cells were transfected using Fugene6 (Roche/Promega) as previously described ([Wei et al. 2000](#_ENREF_36)). Briefly, cells were transfected with 3 l of Fugene6 and 1g of plasmid DNA per well of a 6-well tissue culture plate using OptiMEM (Invitrogen) following the manufacturer´s instructions. H9-hESCs, MSCs, hESC-derived MSCs, hESC-derived NPCs, and HFFs were transfected by Nucleofection (Amaxa) as previously described ([Garcia-Perez et al. 2007](#_ENREF_9); [Coufal et al. 2009](#_ENREF_7); [Wissing et al. 2012](#_ENREF_38)) following the manufacturer’s instructions. To prevent toxicity upon disaggregation ([Watanabe et al. 2007](#_ENREF_35)), hESCs were cultured with 10M iRock (Y-27632, SIGMA) for 1 hour prior to harvesting cells for transfection. Approximately 2x106 hESCs were collected using Tryple Select and transfected with 100l of Human Stem Cell Nucleofector Kit2 (LONZA) solution using the A-23 program and 4 g of plasmid DNA. hESC-derived MSCs, MSCs and HFFs were transfected with Human MSC Nucleofector Kit (LONZA) solution using the C-17 program and 4g of plasmid DNA.

hESCs-derived NPCs were transfected using the Rat Neuronal Stem Cell Nucleofection kit and program A-31. Briefly, hESC-derived NPCs were cultured with 10M iRock (Y-27632, SIGMA) for 1-hour prior to transfection. Cells were detached using StemPro Accutase Cell Dissociation Reagent (Invitrogen), washed and filtered with pre-warmed NB media, and 1x106 hESC-NPCs were transfected with 10 g of the indicated plasmid. After transfection, hESC-derived NPCs were seeded on poly-L-ornithine (Sigma)/laminin (Invitrogen) coated plates and were fed daily with NB media during the course of the retrotransposition assay.

hESCs-derived neurons were transfected using the AD1 Primary Cell 4D-Nucleofector Y Kit (Lonza) and program EH-158. Briefly, 1x105 hESC-derived NPCs were cultured per well in CELLSTAR 24-well plates (Greiner Bio-one), on glass cover slips (Thermo) double-coated with poly-L-ornithine (Sigma)/Laminin (Invitrogen). Neural differentiation from confluent NPCs was induced for 31 days. NB-conditioned media was collected during the differentiation process. After 31 days of neural differentiation, adhered mature neuronal cells were transfected with 15 μg of the indicated plasmid using a 4D-Nucleofector Y Unit (Lonza) in the presence of 4M 5-bromo-2′-deoxyuridine (BrdU, Sigma). After transfection, hESC-derived neurons were fed with a 1:1 mixture of the collected NB-conditioned media and fresh NB media supplemented with 10M iRock (Y-27632, SIGMA) and 4 M BrdU during 5 days prior to analyzing L1-EGFP-expression by immunostaining.

Additional transfection experiments of hESC-derived neurons were conducted using a CalPhos Mammalian Transfection Kit (Clontech) following the manufacturer´s instructions. We transfected 1 g of each plasmid DNA in each well of a 24-well tissue culture plate containing differentiated neurons at day 31.

We also included transfection efficiency controls in retrotransposition assays that were conducted in HeLa, hESCs, hESC-derived MSCs, hESC-derived NPCs, MSCs and HFFs. Only those cells transfected at efficiencies higher than 5% were further analyzed in this study. Briefly, cultured cells were transfected in parallel with an EGFP expression vector (pCEP-EGFP ([Alisch et al. 2006](#_ENREF_1))), and the percentage of EGFP-expressing cells determined at 48 h post-transfection by FACS was used to determine the transfection efficiency of each cell type.

In some assays with *mEGFPI*-tagged L1s, and when indicated, a fraction of transfected cells was treated with 500nM Trichostatin A (TSA) for 16h prior to FACS analyses as described ([Garcia-Perez et al. 2010](#_ENREF_10)) to determine whether L1 retrotransposition events were subject to epigenetic silencing by histone modifications.

***Ad-L1 construct and virus preparation.***

The helper-dependent adenovirus construct A/RT-pgk-L1RP-EGFP used in this study has been previously described ([Soifer et al. 2001](#_ENREF_30); [Kubo et al. 2006](#_ENREF_15)). Briefly, the backbone contains two independent cassettes: i) a marker to follow transduction consisting of a SV40 promoter-beta-gal-SV40polyA cassette and ii) a retrotransposition-competent human LINE-1 (L1RP ([Ostertag et al. 2000](#_ENREF_22))) tagged with the *mEGFPI* retrotransposition indicator cassette ([Ostertag et al. 2000](#_ENREF_22)). To increase LINE-1 expression upon transduction, an exogenous mouse *PGK1* promoter is present upstream of the tagged LINE-1 in the adenoviral backbone. We used pSTK68, a high-capacity helper-dependent adenovirus vector backbone. The A/RT-pgk-L1RP-EGFP (Ad-L1) virus was prepared as described in ([Kubo et al. 2006](#_ENREF_15); [Palmer and Ng 2008](#_ENREF_23)). In all assays, we analyzed transduction efficiency by beta-gal staining or by qPCR (using beta-gal primers). We optimized the amount of Ad-L1 used in assays to ensure that at least 30% of cells were transduced independently of their origin or growing characteristics.

***Transduction of cultured cells and retrotransposition assays using the Ad-L1.***

All cell types, including differentiated cells, were transduced with the A/RT helper-dependent adenovirus (A/RT-pgk-L1RP-EGFP or Ad-L1) as described in ([Kubo et al. 2006](#_ENREF_15)). In this study, we used three lots of Ad-L1 averaging approximately 7.6x1012 viral particles/ml, as determined by absorbance at 260nm with correction for vector genome size ([Palmer and Ng 2008](#_ENREF_23)). LacZ-mediated infectious titer for a single preparation of Ad-L1 was determined by titration on HEK293T cells and X-gal staining to be 1.07x1011 BFU/ml, a particle-to-infectious unit ratio (vp:BFU) of 70:1 ([Palmer and Ng 2008](#_ENREF_23)). To avoid differences among experiments generated by cycles of freezing/thawing, we aliquot each Ad-L1 batch in 5l aliquots. Before an experiment was set-up, we tested each Ad-L1 batch in HeLa cells. In this study, and depending on the cell type used, we used MOIs ranging between 5 and 20. Briefly, cells at 50-70% of confluence were transduced with the required Ad-L1 in serum-free medium. 4-6 hours later, the cultures were washed twice with 1X Phosphate Buffered Saline (PBS) and maintained in their corresponding culture media (see cell culture section). Cells were monitored for EGFP expression by fluorescence microscopy, and 7 days post-transduction cells were collected and: i) subjected to flow cytometry to determine the percentage of EGFP-expressing cells, ii) used to isolate genomic DNA, or iii) fixed and used in immunocytochemistry experiments.

Transduction efficiency was measured 48 h after transduction by beta-gal expression using X-Gal staining and an In Situ beta-Gal Staining Kit (Agilent). Briefly, cells were fixed with 1x fixing solution 10 min at room temperature, and after washing twice with 1xPBS, cells were incubated with 1x staining solution between 15 min and overnight at 37ºC. Staining solution was removed and washed three times with 1xPBS. Detection and quantification was preformed using an infrared fluorescent detection system (Odyssey, LI-COR) according to the recommendations of the manufacturer.

When indicated in NPC-differentiation assays, 4 M BrdU was added to cultured cells shortly after transduction with the Ad-L1. Also when indicated, a fraction of transduced cells was treated with 500nM TSA for 16 h or with 10 M 5-azacytidine (Sigma) during 72 h prior to analysis of L1-EGFP-expression by microscopy.

***Immunocytochemistry analyses.***

Immunocytochemistry assays were conducted as described ([Garcia-Perez et al. 2007](#_ENREF_9); [Coufal et al. 2009](#_ENREF_7); [Wissing et al. 2012](#_ENREF_38)). Cells were fixed with 4% paraformaldehyde for 30 minutes at room temperature. Cold ethanol or methanol fixation was required for some antibodies and samples were fixed for 5 minutes at room temperature. Next, samples were permeabilized in 1xPBS containing 0.1% (v/v) Triton X-100. Fixed cells were next incubated with blocking solution (1% normal goat serum (Sigma) in 1xPBS) for 30 min. After two washes with washing solution (1xPBS containing 0.1% goat serum and 0.05% Triton X-100), the primary antibody was added (diluted in 1xPBS), and slides were incubated overnight at 4°C in a humidified chamber. Slides were then washed three times (1x-PBS containing 0.1% goat serum, 0.05% Triton X-100), and incubated with the secondary antibody for 30 minutes at 4°C. Secondary antibodies were conjugated to Alexa Fluor 488, 546, 555 or 647. After the 30-min incubation, slides were washed twice (1xPBS containing 0,1% goat serum and 0,05% Triton X-100) and mounted with Slow Fade Gold Antifade reagent with DAPI (Life) and sealed with nail polish. Slides were imaged using a Zeiss LSM-710 confocal microscope (Leica), an Axio Imager A1 Microscope (Zeiss), or an EVOS Cell Imaging System (Life). Captured images were analyzed with Zen lite software from Zeiss.

In experiments conducted with BrdU, following fixation and permeabilization, cells were incubated with HCl (1N) for 10 mins on ice to break open DNA structures of the labelled cells. This was followed by an HCl (2N) incubation at room temperature during 10 mins and a final incubation step during 20 mins at 37°C. Immediately after the acid washes, borate buffer (0.1M) was added to slides and slides were incubated during 12 mins at room temperature. Samples were then washed in 1xPBS containing 1% Triton X 100. Next, slides were incubated in 1xPBS containing 1% Triton X-100, 1M glycine (1M) and 5% (v/v) normal goat serum during 1 hour prior to incubating overnight with the anti-BrdU antibody (1:200, Serotec). Following the overnight incubation, samples were washed and then were incubated with the secondary antibody. If immunostaining was combined with BrdU labelling, we first conducted the staining with the indicated antibody and then conducted the BrdU labelling.

Antibodies and dilutions used: monoclonal mouse anti-PTPRC(CD45) (BD Biosciences); anti-EGFP rabbit polyclonal, 1:2000 (Life); anti-EGFP chicken polyclonal, 1:500 (ThermoFisher); anti-beta-galactosidase chicken polyclonal, 1:250, (abcam); anti-TUBB3 mouse monoclonal, 1:1000 (Covance); anti-NES rabbit polyclonal, 1:400 (Covance). anti-RBFOX3 mouse monoclonal, 1:100 (Millipore); anti-MAP2 mouse monoclonal, 1:1000 (Sigma); anti-MAP2 mouse monoclonal, 1:2000 (Thermo); anti-synapsin *I* rabbit polyclonal, 1:1000 (Millipore); anti-TH mouse monoclonal, 1:500 (Millipore), anti-CHAT rabbit polyclonal, 1:200 (Millipore); anti-γ-aminobutyric acid (GABA) rabbit polyclonal, 1:5000 (Sigma); anti-L1Hs-ORF1p rabbit polyclonal (1:1000, generously provided by Dr. Oliver Weichenrieder, Max-Planck, Germany).All secondary antibodies conjugated to Alexa Fluor 488, 546, 555 and 647 were purchased from Life Technologies and used at a 1:1000 dilution.

***Genomic DNA isolation and conventional PCR.***

Genomic DNAs were purified by phenol-chloroform extraction or by using a DNeasy Blood & Tissue Mini Kit (Qiagen) following the manufacturer’s instructions. DNA concentration was measured with a Nanodrop device (Thermo). To assay removal of the intron from the EGFP-based retrotransposition indicator cassette, we used 50 ng of each genomic DNA (gDNA) as a template in 50 l PCR reactions with primers GFP968F and GFP1013R (see Supplemental Table S1 for a list of primers used in this study) ([Coufal et al. 2009](#_ENREF_7)). When indicated, 2 g of gDNA were digested overnight with a molar excess of *Swa*I (NEB) and then used as a template in the PCR reactions. PCR reactions for SV40 and beta-gal sequences were performed with the following primers: sv40pA Fwd and sv40pA Rev; GLB1 Fwd and GLB1 Rev (see Supplemental Table S1). PCRs were carried out using 1.5 units of Taq polymerase (Invitrogen), 1.5 mM MgCl2, 0.8 mM dNTPs (Invitrogen), and 0.2 M of each primer. RNA/DNA-free water (GIBCO) was included as a negative control in all assays. PCR conditions for EGFP amplification were as follows: initial cycle of 95ºC for 2 min, followed by 35 cycles of 15s at 94ºC, 15s at 54ºC, 30s at 72ºC, with a final step of 72ºC for 7 min. PCR conditions for beta-gal and sv40pA amplification were as follows: initial cycle of 95ºC for 2 min, followed by 35 cycles of 15s at 94ºC, 15s at 60ºC, 30s at 72ºC, with a final step of 72ºC for 7 min. PCR products were resolved on 1% agarose gels and when indicated, amplified bands were excised, purified, cloned in pGEMT-Easy (Promega) and sequenced to ensure identity of amplified products.

***Quantitative PCR***

Quantitative PCR experiments were performed using a StepOne Real-Time PCR System (Applied Biosystems) and GoTaq qPCR MasterMix (Promega). Standard curves were performed using serial dilutions of the quantified amplicon, and primer pair efficiency was verified by linear regression. Quantitative PCR reactions were carried out using 40 ng of genomic DNA. To minimize calculation errors, in each qPCR we determined the copy number of the 5S ribosomal RNA gene, as there are 47 copies in the human genome ([Muotri et al. 2010](#_ENREF_21)). To calculate the copy number of L1-EGFP sequences, we validated and used qPCR primers from ([Giorgi et al. 2011](#_ENREF_11)); in calculations, we considered that a normal diploid cell contains 6.6pg of gDNA ([Coufal et al. 2009](#_ENREF_7)). Results are shown as the number of L1-EGFP copies per every 100 cells. To compare insertion rates between different samples, we normalized L1-EGFP copy number values obtained with qPCR primers directed to: the SV40 sequence present in all DNA constructs (in plasmid transfection experiments) or to the beta-gal sequence (in Ad-L1 transduction experiments). Primers sequences are listed in Supplemental Table S1 and results were presented as mean +/-SEM. Samples were compared utilizing a repeated measures one-way ANOVA with a Dunnett or Tukey post-test method. To compare two groups, unpaired student’s *t*-test was applied. Statistically significant findings (p<0.05) are indicated.

***RNA extraction and LINE-1 expression analyses by RT-qPCR and semi-quantitative RT-PCR.***

Total RNA was extracted from cells using Trizol (Invitrogen) following the manufacture’s instructions. Next, 1g of total RNA was treated twice with RNase-free DNaseI (Invitrogen) to avoid cross-contamination of genomic DNA as described ([Munoz-Lopez et al. 2012](#_ENREF_20)). Then, a High-Capacity cDNA Reverse Transcription kit (Applied Biosystems) was used to generate cDNAs. Duplicates samples were analyzed in a StepOne Real-Time PCR System (Applied Biosystems) using GoTaq qPCR MasterMix (Promega).

We routinely used two sets of primers to analyze endogenous L1 expression by RT-qPCR: a pair directed against the L1Hs-5′UTR (N-51 pair, to amplify a 67 bp amplicon) and a pair directed to L1Hs-ORF2 sequences (N-22 pair, to amplify a 64 bp-long fragment); primers were designed using a consensus L1Hs sequence as described ([Coufal et al. 2009](#_ENREF_7); [Munoz-Lopez et al. 2012](#_ENREF_20); [Wissing et al. 2012](#_ENREF_38)) (Supplemental Table S1). GADPH was used as internal normalization control. PCRs were carried out in 20 l reactions and using 0.15 M of each primer. The run method was as follows: 2 min at 95ºC, 40 cycles of 15 sec at 95ºC followed by 30 sec at 57ºC and 30 sec at 72ºC, and a melting curve was performed to confirm the identity of the amplified product.

In semi-quantitative RT-PCR experiments, we used a set of primers that amplify a 236 bp-long fragment of LINE-1 ORF1 sequences (primers ORF1Fwd and ORF1Rev, See Supplemental Table S1) as described ([Garcia-Perez et al. 2007](#_ENREF_9); [Munoz-Lopez et al. 2012](#_ENREF_20)). β-actin amplification (using primers ACTINB Fwd and ACTINB Rev, Supplemental Table S1) was used as an internal normalization control. Approximately 4ng of cDNAs were used per reaction. PCRs were carried out in 50 l using 1.5 units of Taq polymerase (Invitrogen), 1.5 mM MgCl2, 0.8 mM dNTPs (Invitrogen), and 0.2 M of each primer. PCR was set up as follows: 2 min at 95ºC, 25 cycles of 30 sec at 94ºC, followed by 30 sec at 56ºC and 60 sec at 72ºC, and a final extension of 10 min at 72ºC. RNA/DNA-free water was included as a negative control (Invitrogen).

***Whole Cell Extract (WCE) and Ribonucleoprotein particle (RNP) isolation and Western-blot analyses.***

To assay for L1-ORF1p expression in cultured cells, we used either whole cell extracts (WCE) or ribonucleoprotein particle (RNP) preparations derived from the indicated cell type. For WCE extraction, cells were trypsinized and harvested by centrifugation (1200 rpm at 4°C for 5 minutes), washed with 1x PBS, and were incubated with RIPA buffer (Sigma) supplemented with 1x Complete Mini EDTA-free Protease Inhibitor cocktail (Roche), 0.1% Phosphatase Inhibitor 1&2 (Sigma), 1 mM phenylmethyl-sulfonyl fluoride (PMSF) (Sigma) and 0.25% β-mercaptoethanol (Sigma), for 10 minutes on ice. Cell debris was removed by centrifugation (2000 rpm) at 4°C for 5 minutes and total protein concentration was determined using the Micro BCA Protein Assay Kit (Thermo) following standard procedures. L1-RNP isolation was performed as previously described ([Kulpa and Moran 2005](#_ENREF_16)). Briefly, cells were scraped and harvested by centrifugation (1200 rpm at 4°C for 5 min), washed with 1xPBS, and were incubated with 1 ml of RIPA buffer (Sigma) supplemented with 1x Complete Mini EDTA-free Protease Inhibitor cocktail (Roche). After a 10 min incubation on ice, the cell debris was removed by centrifugation (2000 rpm) at 4°C for 5 minutes. A sucrose cushion was prepared with 8.5% and 17% w/v sucrose in 80 mM NaCl, 5 mM MgCl2, 20 mM Tris-HCl pH 7.5, 1mM DTT and 1x Complete Mini EDTA-free Protease Inhibitor cocktail. Lysates were centrifuged during 1 hour at 39000 rpm at 4°C in a Beckman Coulter Optima L-80 XP Ultracentrifuge, SW55Ti rotor. After centrifugation, the pelleted material was re-suspended in 50l of purified water containing 1x Complete Mini EDTA-free Protease Inhibitor cocktail (Roche). Protein concentration was determined by the Bradford method following standard procedures.

Proteins were resolved on 10% SDS-PAGE gels and transferred to nitrocellulose membranes (Bio-Rad). In Western-blot analyses, we used the following antibodies: a polyclonal rabbit antibody against purified L1Hs-ORF1p (1:1000; provided by Dr. Oliver Weichenrieder, Max-Planck, Germany); anti–β-actin (1:20,000; Sigma). Goat anti-rabbit and anti-mouse fluorescent secondary antibodies were used at a 1:20,000 dilution. Detection and quantification was preformed using an infrared fluorescent detection system (Odyssey, LI-COR) according to the recommendations of the manufacturer. Alternatively, the chemiluminescent methodology was used. Anti-rabbit or anti-mouse IgG HRP-linked antibodies (Cell Signalling) were used with Inmun-Star Western C Kit (BIO-RAD) for protein detection. Detection and quantification was preformed using ImageQuant LAS 4000 according to the manufacturer’s recommendations. Western-blots for L1-ORF1p shown in Figure 1C, 2B and 5B were conducted using WCLs, and the rest were conducted using L1-RNPs. For beta-actin western-blots, we always used WCLs.

***L1 promoter methylation studies.***

Bisulfite analyses were performed as previously described ([Coufal et al. 2009](#_ENREF_7); [Munoz-Lopez et al. 2012](#_ENREF_20); [Wissing et al. 2012](#_ENREF_38)). Briefly, genomic DNA was extracted with a DNeasy Blood & Tissue Mini Kit (Qiagen). Bisulfite conversion was performed with the EpiTect Bisulfite Kit (Qiagen) according to the manufacturer’s instructions. For whole-genomic L1 CpG analysis, a PCR reaction was conducted to amplify a 363-bp region in the 5′ UTR containing 20 CpG dinucleotides as described ([Coufal et al. 2009](#_ENREF_7); [Munoz-Lopez et al. 2012](#_ENREF_20)). PCRs were carried out using the Expand High Fidelity PCR System (Roche). We used 1U of Expand High Fidelity Enzyme Mix, 10 x Expand High Fidelity Buffer with MgCl2, 0.8 mM dNTPs (Invitrogen), and 0.2 M of each primer. RNA/DNA-free water was included as a negative control. PCR conditions were as follows: 95ºC for 2 min, 35 cycles of 30s at 94ºC followed by 30s at 54ºC and 60s at 72ºC, with a final extension of 5 min at 72ºC (using primers L1 5'UTRm Fwd and L1 5'UTRm Rev, see Supplemental Table S1). Next, the PCR product (~350-bp amplification band) was purified using a QIAquick gel extraction kit (Qiagen) and purified PCR products were cloned into the pGEM-T Easy Vector (Promega) following the manufacturer’s instructions; we then sequenced more than 20 clones per sample using primers M13 Fwd and M13 Rev. Sequences were analyzed for methylation and the type of LINE-1 amplified identified using RepeatMasker as described ([Munoz-Lopez et al. 2012](#_ENREF_20)).

***Gene expression analyses using ENCODE data***

We exploited deposited data at ENCODE (The ENCODE Project Consortium  [2012](#_ENREF_6)) to analyse expression of host factors known to interact with LINE-1 encoded proteins in the following samples: [ENCSR000CUH](https://www.encodeproject.org/experiments/ENCSR000CUH/) (fibroblasts), [ENCSR000CUA](https://www.encodeproject.org/experiments/ENCSR000CUA/) (Hematopoietic Stem Cells, HSCs), [ENCSR490SQH](https://www.encodeproject.org/experiments/ENCSR490SQH/) (H7-hESCs), [ENCSR000CTZ](https://www.encodeproject.org/experiments/ENCSR000CTZ/) (Mesenchymal stem cells, MSCs) and [ENCSR244ISQ](http://www.ncbi.nlm.nih.gov/geo/query/acc.cgi?acc=GSE78635) (NPCs derived from H9-hESCs). All samples corresponded to stranded PE101 Illumina Hi-Seq RNA-Seq libraries from rRNA-depleted Total RNA > 200 nucleotides in size. Next, we used TopHat2 (v2.1.1) as a fast splice junction mapper for RNA-Seq reads to the Human Genome (GRCH38) using the ultra high-throughput short read aligner [Bowtie](http://bowtie-bio.sourceforge.net/)2 (v2.2.9) as described ([Roman et al. 2016](#_ENREF_28)). Cufflinks (v2.2.1) was next used to assemble transcripts, estimate their abundances, and test for differential gene expression between the RNA-Seq samples. After the identification of significantly differentiated genes ([Rapaport et al. 2013](#_ENREF_24)), we selected (if any) those genes that are known to interact with L1-RNPs (using a list constructed from references ([Goodier et al. 2013](#_ENREF_12); [Taylor et al. 2013](#_ENREF_31); [Moldovan and Moran 2015](#_ENREF_18)) but that also contain previously characterized LINE-1 interactors and known regulators) and evaluated expression differences with respect to hESCs or NPCs. Thus, in total we analyzed the expression pattern of 243 genes in hESCs, MSCs, HSCs, NPCs and fibroblasts. Next, we analyzed which of the 243 genes are upregulated or downregulated in MSCs, HSCs and fibroblasts (these 3 cell types do not support engineered LINE-1 retrotransposition at detectable levels) with respect to NPCs and hESCs, in two independent comparisons. Upon bioinformatic analyses, we detected several LINE-1 interactors that are differentially expressed in MSCs, HSCs and fibroblasts (Supplemental Figure 12).

**SUPPLEMENTAL REFERENCES**

Alisch RS, Garcia-Perez JL, Muotri AR, Gage FH, Moran JV. 2006. Unconventional translation of mammalian LINE-1 retrotransposons. *Genes Dev* **20**(2): 210-224.

Athanikar JN, Badge RM, Moran JV. 2004. A YY1-binding site is required for accurate human LINE-1 transcription initiation. *Nucleic acids research* **32**(13): 3846-3855.

Brouha B, Meischl C, Ostertag E, de Boer M, Zhang Y, Neijens H, Roos D, Kazazian HH, Jr. 2002. Evidence consistent with human L1 retrotransposition in maternal meiosis I. *Am J Hum Genet* **71**(2): 327-336.

Chadwick K, Wang L, Li L, Menendez P, Murdoch B, Rouleau A, Bhatia M. 2003. Cytokines and BMP-4 promote hematopoietic differentiation of human embryonic stem cells. *Blood* **102**(3): 906-915.

Choi KD, Vodyanik M, Slukvin, II. 2011. Hematopoietic differentiation and production of mature myeloid cells from human pluripotent stem cells. *Nature protocols* **6**(3): 296-313.

Coufal NG, Garcia-Perez JL, Peng GE, Yeo GW, Mu Y, Lovci MT, Morell M, O'Shea KS, Moran JV, Gage FH. 2009. L1 retrotransposition in human neural progenitor cells. *Nature* **460**(7259): 1127-1131.

The ENCODE Project Consortium. 2012. An integrated encyclopedia of DNA elements in the human genome. *Nature* **489**(7414): 57-74.

Freeman JD, Goodchild NL, Mager DL. 1994. A modified indicator gene for selection of retrotransposition events in mammalian cells. *Biotechniques* **17**(1): 46, 48-49, 52.

Garcia-Perez JL, Marchetto MC, Muotri AR, Coufal NG, Gage FH, O'Shea KS, Moran JV. 2007. LINE-1 retrotransposition in human embryonic stem cells. *Hum Mol Genet* **16**(13): 1569-1577.

Garcia-Perez JL, Morell M, Scheys JO, Kulpa DA, Morell S, Carter CC, Hammer GD, Collins KL, O'Shea KS, Menendez P et al. 2010. Epigenetic silencing of engineered L1 retrotransposition events in human embryonic carcinoma cells. *Nature* **466**(7307): 769-773.

Giorgi G, Marcantonio P, Del Re B. 2011. LINE-1 retrotransposition in human neuroblastoma cells is affected by oxidative stress. *Cell and tissue research* **346**(3): 383-391.

Goodier JL, Cheung LE, Kazazian HH, Jr. 2013. Mapping the LINE1 ORF1 protein interactome reveals associated inhibitors of human retrotransposition. *Nucleic acids research* **41**(15): 7401-7419.

Ji J, Vijayaragavan K, Bosse M, Menendez P, Weisel K, Bhatia M. 2008. OP9 stroma augments survival of hematopoietic precursors and progenitors during hematopoietic differentiation from human embryonic stem cells. *Stem Cells* **26**(10): 2485-2495.

Kimberland ML, Divoky V, Prchal J, Schwahn U, Berger W, Kazazian HH, Jr. 1999. Full-length human L1 insertions retain the capacity for high frequency retrotransposition in cultured cells. *Hum Mol Genet* **8**(8): 1557-1560.

Kubo S, Seleme MC, Soifer HS, Perez JL, Moran JV, Kazazian HH, Jr., Kasahara N. 2006. L1 retrotransposition in nondividing and primary human somatic cells. *Proc Natl Acad Sci U S A* **103**(21): 8036-8041.

Kulpa DA, Moran JV. 2005. Ribonucleoprotein particle formation is necessary but not sufficient for LINE-1 retrotransposition. *Hum Mol Genet* **14**(21): 3237-3248.

Menendez P, Wang L, Chadwick K, Li L, Bhatia M. 2004. Retroviral transduction of hematopoietic cells differentiated from human embryonic stem cell-derived CD45(neg)PFV hemogenic precursors. *Molecular therapy : the journal of the American Society of Gene Therapy* **10**(6): 1109-1120.

Moldovan JB, Moran JV. 2015. The Zinc-Finger Antiviral Protein ZAP Inhibits LINE and Alu Retrotransposition. *PLoS genetics* **11**(5): e1005121.

Moran JV, Holmes SE, Naas TP, DeBerardinis RJ, Boeke JD, Kazazian HH, Jr. 1996. High frequency retrotransposition in cultured mammalian cells. *Cell* **87**(5): 917-927.

Munoz-Lopez M, Garcia-Canadas M, Macia A, Morell S, Garcia-Perez JL. 2012. Analysis of LINE-1 expression in human pluripotent cells. *Methods in molecular biology* **873**: 113-125.

Muotri AR, Marchetto MC, Coufal NG, Oefner R, Yeo G, Nakashima K, Gage FH. 2010. L1 retrotransposition in neurons is modulated by MeCP2. *Nature* **468**(7322): 443-446.

Ostertag EM, Prak ET, DeBerardinis RJ, Moran JV, Kazazian HH, Jr. 2000. Determination of L1 retrotransposition kinetics in cultured cells. *Nucleic acids research* **28**(6): 1418-1423.

Palmer DJ, Ng P. 2008. Methods for the production of helper-dependent adenoviral vectors. *Methods in molecular biology* **433**: 33-53.

Rapaport F, Khanin R, Liang Y, Pirun M, Krek A, Zumbo P, Mason CE, Socci ND, Betel D. 2013. Comprehensive evaluation of differential gene expression analysis methods for RNA-seq data. *Genome biology* **14**(9): R95.

Raya A, Rodriguez-Piza I, Guenechea G, Vassena R, Navarro S, Barrero MJ, Consiglio A, Castella M, Rio P, Sleep E et al. 2009. Disease-corrected haematopoietic progenitors from Fanconi anaemia induced pluripotent stem cells. *Nature* **460**(7251): 53-59.

Real PJ, Ligero G, Ayllon V, Ramos-Mejia V, Bueno C, Gutierrez-Aranda I, Navarro-Montero O, Lako M, Menendez P. 2012. SCL/TAL1 regulates hematopoietic specification from human embryonic stem cells. *Molecular therapy : the journal of the American Society of Gene Therapy* **20**(7): 1443-1453.

Richardson SR, Narvaiza I, Planegger RA, Weitzman MD, Moran JV. 2014. APOBEC3A deaminates transiently exposed single-strand DNA during LINE-1 retrotransposition. *eLife* **3**(Apr 24).

Roman AC, Morales-Hernandez A, Fernandez-Salguero PM. 2016. RNA-Seq Analysis to Measure the Expression of SINE Retroelements. *Methods in molecular biology* **1400**: 107-116.

Sanchez L, Gutierrez-Aranda I, Ligero G, Rubio R, Munoz-Lopez M, Garcia-Perez JL, Ramos V, Real PJ, Bueno C, Rodriguez R et al. 2011. Enrichment of human ESC-derived multipotent mesenchymal stem cells with immunosuppressive and anti-inflammatory properties capable to protect against experimental inflammatory bowel disease. *Stem Cells* **29**(2): 251-262.

Soifer H, Higo C, Kazazian HH, Jr., Moran JV, Mitani K, Kasahara N. 2001. Stable integration of transgenes delivered by a retrotransposon-adenovirus hybrid vector. *Hum Gene Ther* **12**(11): 1417-1428.

Taylor MS, Lacava J, Mita P, Molloy KR, Huang CR, Li D, Adney EM, Jiang H, Burns KH, Chait BT et al. 2013. Affinity Proteomics Reveals Human Host Factors Implicated in Discrete Stages of LINE-1 Retrotransposition. *Cell* **155**(5): 1034-1048.

Vodyanik MA, Slukvin, II. 2007. Hematoendothelial differentiation of human embryonic stem cells. *Current protocols in cell biology / editorial board, Juan S Bonifacino [et al]* **Chapter 23**: Unit 23 26.

Wang L. 2006. Endothelial and hematopoietic cell fate of human embryonic stem cells. *Trends in cardiovascular medicine* **16**(3): 89-94.

Wang L, Cerdan C, Menendez P, Bhatia M. 2006. Derivation and characterization of hematopoietic cells from human embryonic stem cells. *Methods in molecular biology* **331**: 179-200.

Watanabe K, Ueno M, Kamiya D, Nishiyama A, Matsumura M, Wataya T, Takahashi JB, Nishikawa S, Nishikawa S, Muguruma K et al. 2007. A ROCK inhibitor permits survival of dissociated human embryonic stem cells. *Nat Biotechnol* **25**(6): 681-686.

Wei W, Morrish TA, Alisch RS, Moran JV. 2000. A transient assay reveals that cultured human cells can accommodate multiple LINE-1 retrotransposition events. *Anal Biochem* **284**(2): 435-438.

Wissing S, Montano M, Garcia-Perez JL, Moran JV, Greene WC. 2011. Endogenous APOBEC3B restricts LINE-1 retrotransposition in transformed cells and human embryonic stem cells. *The Journal of biological chemistry* **286**(42): 36427-36437.

Wissing S, Munoz-Lopez M, Macia A, Yang Z, Montano M, Collins W, Garcia-Perez JL, Moran JV, Greene WC. 2012. Reprogramming Somatic Cells into iPS Cells Activates LINE-1 Retroelement Mobility. *Hum Mol Genet* **21**(1): 208-218.

Zeuthen J, Norgaard JO, Avner P, Fellous M, Wartiovaara J, Vaheri A, Rosen A, Giovanella BC. 1980. Characterization of a human ovarian teratocarcinoma-derived cell line. *Int J Cancer* **25**(1): 19-32.
